# Supplementary material for: An Extensive Survey of Ciguatoxins on Grouper Variola louti from the Ryukyu Islands, Japan, Using Liquid Chromatography–Tandem Mass Spectrometry (LC-MS/MS)
Source: MDPI journal article supplement (doi:10.3390/jmse10030423), 2022-03-15
Supplement: s1 [file s1]

# An Extensive survey of ciguatoxins on grouper *Variola louti* from the Ryukyu Islands, Japan, using liquid chromatography-tandem mass spectrometry (LC-MS/MS)

Naomasa Oshiro <sup>1,\*</sup>, Hiroya Nagasawa <sup>1,2</sup>, Miharuru Watanabe <sup>1,2</sup>, Mio Nshimura <sup>3,†</sup>, Kyoko Kuniyoshi <sup>1</sup>, Naoki Kobayashi <sup>2</sup>, Yoshiko Sugita-Konishi <sup>2,‡</sup>, Hiroshi Asakura <sup>1</sup>, Katsunori Tachihara <sup>4,\*</sup> and Takeshi Yasumoto <sup>5</sup>

**Table S1.** The *V. louti* specimens analyzed in this study and their CTXs levels.

| Specimen ID | Collection date <sup>1</sup> | Age (y) <sup>2</sup> | SL <sup>3</sup> (cm) | BW <sup>4</sup> (g) | CF <sup>5</sup> | Sex <sup>6</sup> | Collection Area <sup>7</sup> | CTXs level (µg/kg) <sup>8</sup> |             |         |       |
|-------------|------------------------------|----------------------|----------------------|---------------------|-----------------|------------------|------------------------------|---------------------------------|-------------|---------|-------|
|             |                              |                      |                      |                     |                 |                  |                              | 1B                              | epi-deoxy1B | deoxy1B | Total |
| 141065      | 06/Aug/2013                  | 6                    | 36.5                 | 1330                | 2.74            | F                | East, Okinawa                | 0                               | 0           | 0       | 0     |
| 141069      | 14/Aug/2013                  | 3                    | 30.2                 | 910                 | 3.30            | F                | South West, Okinawa          | 0.003                           | 0.003       | 0.004   | 0.010 |
| 141070      | 09/Sep/2013                  | 9                    | 46.5                 | 3240                | 3.22            | M                | South West, Okinawa          | 0.005                           | 0.006       | 0.007   | 0.017 |
| 141071      | 09/Sep/2013                  | 6                    | 38.8                 | 1680                | 2.88            | F                | South West, Okinawa          | 0.021                           | 0.019       | 0.026   | 0.066 |
| 141072      | 10/Sep/2013                  | 3                    | 26.7                 | 615                 | 3.23            | F                | North West, Okinawa          | 0                               | 0           | 0       | 0     |
| 141073      | 10/Sep/2013                  | 5                    | 33.9                 | 1260                | 3.23            | F                | North West, Okinawa          | 0.003                           | 0.003       | 0.003   | 0.009 |
| 141074      | 10/Sep/2013                  | 3                    | 33.3                 | 1090                | 2.95            | F                | North West, Okinawa          | 0                               | 0           | 0       | 0     |
| 141075      | 24/Sep/2013                  | 2                    | 20.1                 | 248                 | 3.07            | F                | North West, Okinawa          | 0                               | 0           | 0       | 0     |
| 141076      | 30/Sep/2013                  | 7                    | 46.8                 | 3325                | 3.24            | F                | North West, Okinawa          | 0.047                           | 0.047       | 0.073   | 0.167 |
| 141077      | 03/Oct/2013                  | 2                    | 25.3                 | 505                 | 3.14            | F                | South West, Okinawa          | 0                               | 0           | 0       | 0     |
| 141078      | 11/Oct/2013                  | 5                    | 41.2                 | 1850                | 2.65            | F                | South West, Okinawa          | 0.005                           | 0.003       | 0.006   | 0.013 |
| 141079      | 12/Oct/2013                  | 2                    | 21.2                 | 300                 | 3.17            | F                | North West, Okinawa          | 0.003                           | 0.003       | 0       | 0.006 |
| 141080      | 19/Oct/2013                  | 3                    | 36.0                 | 1385                | 2.97            | F                | North West, Okinawa          | 0.016                           | 0.022       | 0.029   | 0.067 |
| 141081      | 19/Oct/2013                  | 5                    | 38.8                 | 1630                | 2.79            | F                | North West, Okinawa          | 0                               | 0           | 0       | 0     |
| 141082      | 19/Oct/2013                  | 5                    | 39.8                 | 1600                | 2.54            | F                | North West, Okinawa          | 0                               | 0           | 0       | 0     |
| 141083      | 19/Oct/2013                  | 9                    | 41.5                 | 2020                | 2.83            | F                | South West, Okinawa          | 0                               | 0           | 0       | 0     |
| 141084      | 31/Oct/2013                  | 10                   | 49.1                 | 3540                | 2.99            | M                | East, Okinawa                | 0.015                           | 0.010       | 0.012   | 0.037 |
| 141085      | 31/Oct/2013                  | 5                    | 38.6                 | 1620                | 2.82            | F                | East, Okinawa                | 0.028                           | 0.028       | 0.034   | 0.090 |
| 141086      | 02/Nov/2013                  | 4                    | 34.1                 | 1100                | 2.77            | F                | North West, Okinawa          | 0.008                           | 0.008       | 0.008   | 0.024 |
| 141087      | 02/Nov/2013                  | 4                    | 31.9                 | 826                 | 2.54            | F                | North West, Okinawa          | 0                               | 0           | 0       | 0     |
| 141088      | 02/Nov/2013                  | 4                    | 31.0                 | 917                 | 3.08            | F                | North West, Okinawa          | 0                               | 0           | 0       | 0     |
| 141089      | 06/Nov/2013                  | 3                    | 29.4                 | 900                 | 3.54            | F                | North West, Okinawa          | 0                               | 0           | 0       | 0     |
| 141090      | 15/Nov/2013                  | 3                    | 29.2                 | 900                 | 3.61            | F                | South West, Okinawa          | 0.005                           | 0.003       | 0.003   | 0.011 |
| 141091      | 15/Nov/2013                  | 2                    | 27.8                 | 673                 | 3.15            | F                | South West, Okinawa          | 0                               | 0           | 0       | 0     |
| 141092      | 16/Nov/2013                  | 5                    | 44.0                 | 2800                | 3.29            | M                | North West, Okinawa          | 0.003                           | 0.003       | 0.007   | 0.013 |
| 141093      | 16/Nov/2013                  | 4                    | 31.9                 | 1010                | 3.11            | F                | North West, Okinawa          | 0.003                           | 0           | 0       | 0.003 |
| 141094      | 02/Dec/2013                  | 3                    | 26.8                 | 667                 | 3.48            | F                | South West, Okinawa          | 0                               | 0           | 0       | 0     |
| 141095      | 02/Dec/2013                  | 3                    | 29.3                 | 960                 | 3.84            | F                | East, Okinawa                | 0.007                           | 0.006       | 0.006   | 0.018 |
| 141098      | 07/Dec/2013                  | 5                    | 35.7                 | 1290                | 2.84            | F                | East, Okinawa                | 0                               | 0           | 0       | 0     |
| 141108      | 24/Jan/2014                  | 8                    | 44.5                 | 2700                | 3.06            | M                | South West, Okinawa          | 0.015                           | 0.003       | 0.006   | 0.024 |
| 141109      | 29/Jan/2014                  | 10                   | 47.9                 | 3200                | 2.91            | M                | South West, Okinawa          | 0.049                           | 0.032       | 0.047   | 0.128 |
| 141116      | 08/Feb/2014                  | NO                   | 22.6                 | 465                 | 4.03            | F                | North West, Okinawa          | 0                               | 0           | 0       | 0     |
| 141117      | 18/Feb/2014                  | 2                    | 24.4                 | 474                 | 3.26            | F                | North West, Okinawa          | 0                               | 0           | 0       | 0     |
| 150090      | 16/Nov/2015                  | NO                   | 53.0                 | 4800                | 3.22            | NI               | unknown                      | 0                               | 0           | 0       | 0     |
| 150091      | 16/Nov/2015                  | NO                   | 48.0                 | 3300                | 2.98            | NI               | unknown                      | 0                               | 0           | 0       | 0     |
| 150092      | 16/Nov/2015                  | NO                   | 46.0                 | 2700                | 2.77            | NI               | unknown                      | 0                               | 0           | 0       | 0     |
| 153001      | 01/Sep/2014                  | 4                    | 35.0                 | 1335                | 3.11            | F                | East, Okinawa                | 0.006                           | 0           | 0       | 0.006 |
| 153002      | 01/Sep/2014                  | 3                    | 28.6                 | 703                 | 3.01            | F                | East, Okinawa                | 0.011                           | 0.003       | 0.003   | 0.017 |
| 153003      | 01/Sep/2014                  | 2                    | 23.4                 | 339                 | 2.65            | F                | East, Okinawa                | 0.012                           | 0.003       | 0.003   | 0.018 |
| 153004      | 13/Sep/2014                  | 5                    | 37.5                 | 1345                | 2.55            | F                | Yaeyama                      | 0.026                           | 0.018       | 0.021   | 0.065 |
| 153005      | 13/Sep/2014                  | 4                    | 33.4                 | 971                 | 2.61            | F                | Yaeyama                      | 0.013                           | 0.003       | 0.003   | 0.019 |
| 153006      | 19/Sep/2014                  | 3                    | 28.4                 | 777                 | 3.39            | F                | South West, Okinawa          | 0.014                           | 0.003       | 0.003   | 0.020 |

<sup>1</sup> UK: unknown, <sup>2</sup> y: years; NO: not observed, <sup>3</sup> SL: standard length, <sup>4</sup> BW: body weight, <sup>5</sup> CF: condition factor, CF = 100 × BW/SL<sup>2</sup>, <sup>6</sup> F: female; M: male; bi: bisexual; NI: not identified, <sup>7</sup> the locations of collection areas are shown in Figure 2, <sup>8</sup> 1B: CTX1B; epi-deoxy1B: 52-epi-54-deoxyCTX1B; deoxy1B: 54-deoxyCTX1B; 0: less than LOD; 0.003: detected but less than LOQ.

Table S1. Continued.

| Specimen ID | Collection date <sup>1</sup> | Age (y) <sup>2</sup> | SL <sup>3</sup> (cm) | BW <sup>4</sup> (g) | CF <sup>5</sup> | Sex <sup>6</sup> | Collection Area <sup>7</sup> | CTXs level (µg/kg) <sup>8</sup> |             |         |       |
|-------------|------------------------------|----------------------|----------------------|---------------------|-----------------|------------------|------------------------------|---------------------------------|-------------|---------|-------|
|             |                              |                      |                      |                     |                 |                  |                              | 1B                              | epi-deoxy1B | deoxy1B | Total |
| 153007      | 19/Sep/2014                  | NO                   | 32.4                 | 1152                | 3.39            | F                | South West, Okinawa          | 0.011                           | 0.006       | 0.003   | 0.020 |
| 153008      | UK                           | 1                    | 18.5                 | 178                 | 2.81            | NI               | South West, Okinawa          | 0.003                           | 0           | 0       | 0.003 |
| 153009      | 29/Sep/2014                  | NO                   | 13.5                 | 92                  | 3.74            | F                | South West, Okinawa          | 0.006                           | 0           | 0       | 0.006 |
| 153010      | 20/Oct/2014                  | 5                    | 39.4                 | 1548                | 2.53            | F                | South West, Okinawa          | 0.008                           | 0.003       | 0.003   | 0.014 |
| 153011      | 20/Oct/2014                  | NO                   | 25.0                 | 379                 | 2.43            | F                | South West, Okinawa          | 0.007                           | 0           | 0       | 0.007 |
| 153012      | 22/Oct/2014                  | 5                    | 41.8                 | 1915                | 2.62            | F                | South West, Okinawa          | 0.021                           | 0.017       | 0.026   | 0.064 |
| 153013      | 22/Oct/2014                  | 2                    | 25.8                 | 566                 | 3.30            | F                | South West, Okinawa          | 0.009                           | 0           | 0       | 0.009 |
| 153014      | 22/Oct/2014                  | 2                    | 24.6                 | 400                 | 2.69            | F                | South West, Okinawa          | 0.010                           | 0           | 0       | 0.010 |
| 153015      | 22/Oct/2014                  | 3                    | 26.2                 | 543                 | 3.02            | F                | South West, Okinawa          | 0.003                           | 0           | 0       | 0.003 |
| 153016      | 04/Nov/2014                  | 4                    | 43.3                 | 1993                | 2.45            | M                | South West, Okinawa          | 0.006                           | 0           | 0       | 0.006 |
| 153017      | 04/Nov/2014                  | 4                    | 34.6                 | 1235                | 2.98            | F                | South West, Okinawa          | 0.003                           | 0           | 0       | 0.003 |
| 153018      | 12/Nov/2014                  | 3                    | 32.9                 | 975                 | 2.74            | F                | North West, Okinawa          | 0                               | 0           | 0       | 0     |
| 153019      | 13/Nov/2014                  | 2                    | 30.1                 | 941                 | 3.45            | F                | North West, Okinawa          | 0.006                           | 0           | 0       | 0.006 |
| 153020      | 22/Nov/2014                  | 2                    | 27.1                 | 705                 | 3.54            | F                | Amami                        | 0.008                           | 0           | 0       | 0.008 |
| 153021      | 03/Dec/2014                  | NO                   | 48.2                 | 2585                | 2.31            | bi               | Amami                        | 0.017                           | 0.005       | 0.007   | 0.029 |
| 153022      | 27/Jan/2015                  | 3                    | 33.3                 | 1145                | 3.10            | bi               | South West, Okinawa          | 0.003                           | 0.003       | 0.003   | 0.009 |
| 153023      | 19/Dec/2014                  | NO                   | 22.2                 | 397                 | 3.63            | F                | Amami                        | 0.003                           | 0           | 0       | 0.003 |
| 153056      | 18/Apr/2015                  | 6                    | 45.3                 | 2622                | 2.82            | NI               | South West, Okinawa          | 0                               | 0           | 0       | 0     |
| 153057      | 18/Apr/2015                  | 2                    | 22.3                 | 368                 | 3.32            | F                | South West, Okinawa          | 0                               | 0           | 0       | 0     |
| 153058      | 07/May/2015                  | 2                    | 18.8                 | 184                 | 2.77            | F                | South West, Okinawa          | 0.005                           | 0.003       | 0       | 0.008 |
| 153059      | 18/May/2015                  | NO                   | 16.8                 | 135                 | 2.85            | F                | South West, Okinawa          | 0                               | 0           | 0       | 0     |
| 153060      | 18/May/2015                  | NO                   | 16.7                 | 125                 | 2.68            | F                | South West, Okinawa          | 0                               | 0           | 0       | 0     |
| 153061      | 28/May/2015                  | 7                    | 47.3                 | 3720                | 3.52            | M                | South West, Okinawa          | 0.020                           | 0.019       | 0.026   | 0.065 |
| 153062      | 28/May/2015                  | 3                    | 26.4                 | 515                 | 2.80            | F                | South West, Okinawa          | 0.005                           | 0           | 0       | 0.005 |
| 153063      | 28/May/2015                  | 2                    | 27.8                 | 699                 | 3.25            | F                | South West, Okinawa          | 0.058                           | 0.037       | 0.047   | 0.142 |
| 160024      | 25/May/2016                  | NO                   | 49.0                 | 2934                | 2.49            | NI               | Miyako                       | 0.103                           | 0.042       | 0.104   | 0.249 |
| 160085      | UK                           | NO                   | 41.0                 | 1734                | 2.52            | NI               | unknown                      | 0.023                           | 0.007       | 0.016   | 0.045 |
| 160135      | 19/Dec/2016                  | NO                   | 49.0                 | 2594                | 2.20            | NI               | Miyako                       | 0.050                           | 0.021       | 0.054   | 0.125 |
| 160136      | 19/Dec/2016                  | NO                   | 45.0                 | 2430                | 2.67            | NI               | Miyako                       | 0.042                           | 0.174       | 0.067   | 0.283 |
| 163015      | 14/Dec/2015                  | NO                   | 28.0                 | 649                 | 2.96            | NI               | South West, Okinawa          | 0                               | 0           | 0       | 0     |
| 163016      | 14/Dec/2015                  | 2                    | 26.0                 | 540                 | 3.07            | F                | South West, Okinawa          | 0                               | 0           | 0       | 0     |
| 163017      | UK                           | 2                    | 27.3                 | 588                 | 2.89            | F                | North West, Okinawa          | 0                               | 0           | 0       | 0     |
| 163018      | 30/Jan/2016                  | 2                    | 31.0                 | 833                 | 2.80            | F                | South West, Okinawa          | 0                               | 0           | 0       | 0     |
| 163019      | 29/Jan/2016                  | 7                    | 47.6                 | 2540                | 2.36            | NI               | North West, Okinawa          | 0.019                           | 0.014       | 0.026   | 0.059 |
| 163020      | 29/Jan/2016                  | 5                    | 41.2                 | 1798                | 2.57            | F                | North West, Okinawa          | 0                               | 0           | 0       | 0     |
| 163021      | 30/Jan/2016                  | 5                    | 41.0                 | 1750                | 2.54            | bi               | North West, Okinawa          | 0.005                           | 0.003       | 0.003   | 0.011 |
| 163022      | 30/Jan/2016                  | 6                    | 44.0                 | 2320                | 2.72            | F                | North West, Okinawa          | 0.010                           | 0.006       | 0.009   | 0.025 |
| 163023      | 30/Jan/2016                  | 4                    | 26.3                 | 491                 | 2.70            | F                | North West, Okinawa          | 0.003                           | 0           | 0       | 0.003 |
| 163024      | 05/Feb/2016                  | 4                    | 37.2                 | 1606                | 3.12            | F                | South West, Okinawa          | 0.003                           | 0.003       | 0.003   | 0.009 |
| 163025      | 05/Feb/2016                  | 5                    | 29.5                 | 772                 | 3.01            | F                | South West, Okinawa          | 0.009                           | 0.003       | 0.003   | 0.015 |
| 163026      | 19/Feb/2016                  | 4                    | 43.0                 | 2375                | 2.99            | M                | South West, Okinawa          | 0.012                           | 0.006       | 0.011   | 0.030 |
| 163027      | 19/Feb/2016                  | 3                    | 36.5                 | 1547                | 3.18            | F                | South West, Okinawa          | 0.007                           | 0.003       | 0.003   | 0.013 |

<sup>1</sup> UK: unknown, <sup>2</sup> yo: years; NO: not observed, <sup>3</sup> SL: standard length, <sup>4</sup> BW: body weight, <sup>5</sup> CF: condition factor, CF = 100 × BW/SL<sup>2</sup>, <sup>6</sup> F: female; M: male; bi: bisexual; NI: not identified, <sup>7</sup> the locations of collection areas are shown in Figure 2, <sup>8</sup> 1B: CTX1B; epi-deoxy1B: 52-epi-54-deoxyCTX1B; deoxy1B: 54-deoxyCTX1B; 0: less than LOD; 0.003: detected but less than LOQ.

Table S1. Continued.

| Specimen ID | Collection date <sup>1</sup> | Age (y) <sup>2</sup> | SL <sup>3</sup> (cm) | BW <sup>4</sup> (g) | CF <sup>5</sup> | Sex <sup>6</sup> | Collection Area <sup>7</sup> | CTXs level (µg/kg) <sup>8</sup> |             |         |       |
|-------------|------------------------------|----------------------|----------------------|---------------------|-----------------|------------------|------------------------------|---------------------------------|-------------|---------|-------|
|             |                              |                      |                      |                     |                 |                  |                              | 1B                              | epi-deoxy1B | deoxy1B | Total |
| 163028      | 19/Feb/2016                  | NO                   | 36.3                 | 1345                | 2.81            | F                | South West, Okinawa          | 0                               | 0           | 0       | 0     |
| 163029      | 19/Feb/2016                  | 5                    | 32.0                 | 1087                | 3.32            | F                | South West, Okinawa          | 0.003                           | 0           | 0.003   | 0.006 |
| 163030      | 19/Feb/2016                  | 4                    | 34.5                 | 1236                | 3.01            | F                | South West, Okinawa          | 0.007                           | 0.006       | 0.006   | 0.019 |
| 163031      | 19/Feb/2016                  | NO                   | 27.0                 | 564                 | 2.87            | F                | South West, Okinawa          | 0.006                           | 0.003       | 0.003   | 0.012 |
| 163039      | 18/Mar/2016                  | 4                    | 32.1                 | 1061                | 3.21            | F                | South West, Okinawa          | 0.005                           | 0           | 0       | 0.005 |
| 163040      | 18/Mar/2016                  | NO                   | 37.6                 | 1524                | 2.87            | F                | South West, Okinawa          | 0.012                           | 0           | 0       | 0.012 |
| 163041      | 18/Mar/2016                  | 4                    | 34.0                 | 1360                | 3.46            | M                | South West, Okinawa          | 0.012                           | 0           | 0       | 0.012 |
| 163046      | 12/Dec/2015                  | 7                    | 40.7                 | 2216                | 3.29            | M                | South West, Okinawa          | 0.014                           | 0.003       | 0.008   | 0.025 |
| 163047      | 12/Dec/2015                  | 7                    | 40.0                 | 1826                | 2.85            | F                | South West, Okinawa          | 0.012                           | 0.006       | 0.009   | 0.027 |
| 163048      | 15/Dec/2015                  | 5                    | 38.2                 | 1391                | 2.50            | NI               | South West, Okinawa          | 0.020                           | 0.019       | 0.029   | 0.068 |
| 163049      | UK                           | NO                   | 31.7                 | 897                 | 2.82            | F                | North West, Okinawa          | 0.010                           | 0.003       | 0.003   | 0.016 |
| 163050      | UK                           | 4                    | 40.6                 | 1872                | 2.80            | M                | North West, Okinawa          | 0.007                           | 0.003       | 0.003   | 0.013 |
| 163051      | 05/Feb/2016                  | NO                   | 31.8                 | 1089                | 3.39            | F                | South West, Okinawa          | 0.009                           | 0.003       | 0.003   | 0.015 |
| 163052      | 05/Feb/2016                  | 4                    | 35.2                 | 1611                | 3.69            | F                | South West, Okinawa          | 0.010                           | 0.003       | 0.006   | 0.019 |
| 163053      | 19/Feb/2016                  | 4                    | 38.4                 | 1596                | 2.82            | M                | South West, Okinawa          | 0.005                           | 0           | 0       | 0.005 |
| 163062      | 13/Oct/2015                  | 1                    | 20.2                 | 291                 | 3.53            | F                | South West, Okinawa          | 0.003                           | 0           | 0       | 0.003 |
| 163063      | 05/Aug/2015                  | 12                   | 50.4                 | 4100                | 3.20            | NI               | Amami                        | 0.063                           | 0.035       | 0.056   | 0.154 |
| 163064      | 21/May/2015                  | 14                   | 47.5                 | 2880                | 2.69            | M                | Amami                        | 0.045                           | 0.027       | 0.036   | 0.108 |
| 163065      | 16/Oct/2015                  | 13                   | 49.6                 | 3040                | 2.49            | M                | South West, Okinawa          | 0.093                           | 0.039       | 0.103   | 0.235 |
| 163067      | 31/Mar/2016                  | 4                    | 33.7                 | 1385                | 3.62            | F                | North West, Okinawa          | 0.011                           | 0.008       | 0.011   | 0.031 |
| 163068      | 31/Mar/2016                  | 2                    | 31.2                 | 1050                | 3.46            | F                | North West, Okinawa          | 0                               | 0           | 0       | 0     |
| 163069      | 31/Mar/2016                  | 5                    | 39.0                 | 1606                | 2.71            | F                | North West, Okinawa          | 0                               | 0           | 0       | 0     |
| 163070      |                              | 10                   | 40.2                 | 2072                | 3.19            | F                | Amami                        | 0.005                           | 0.003       | 0.003   | 0.011 |
| 163071      | 不明                           | 14                   | 46.2                 | 3060                | 3.10            | M                | Amami                        | 0.047                           | 0.028       | 0.058   | 0.133 |
| 163072      | 27/May/2016                  | 12                   | 44.6                 | 2861                | 3.22            | F                | Amami                        | 0.015                           | 0.003       | 0.006   | 0.024 |
| 163073      | 05/Sep/2016                  | 4                    | 32.2                 | 1004                | 3.01            | F                | Miyako                       | 0.008                           | 0.009       | 0.010   | 0.028 |
| 163074      | 05/Sep/2016                  | NO                   | 40.3                 | 1728                | 2.64            | F                | Miyako                       | 0.014                           | 0.015       | 0.014   | 0.043 |
| 163075      | 05/Sep/2016                  | 4                    | 31.3                 | 933                 | 3.04            | F                | Miyako                       | 0                               | 0           | 0       | 0     |
| 163076      | 30/Sep/2016                  | 4                    | 30.4                 | 934                 | 3.32            | F                | Miyako                       | 0                               | 0           | 0       | 0     |
| 163077      | 07/Oct/2016                  | 12                   | 45.6                 | 2719                | 2.87            | M                | South West, Okinawa          | 0.141                           | 0.078       | 0.157   | 0.376 |
| 163078      | 07/Oct/2016                  | 3                    | 30.0                 | 795                 | 2.94            | F                | South West, Okinawa          | 0                               | 0           | 0       | 0     |
| 163095      | 07/Oct/2016                  | 2                    | 25.5                 | 570                 | 3.44            | F                | South West, Okinawa          | 0                               | 0           | 0       | 0     |
| 163096      | 29/Mar/2016                  | 3                    | 26.6                 | 644                 | 3.42            | F                | South West, Okinawa          | 0                               | 0           | 0       | 0     |
| 163097      | 29/Mar/2016                  | 2                    | 32.7                 | 1227                | 3.51            | F                | South West, Okinawa          | 0.003                           | 0.003       | 0.003   | 0.009 |
| 163098      | 29/Mar/2016                  | 2                    | 26.9                 | 721                 | 3.70            | F                | South West, Okinawa          | 0                               | 0           | 0       | 0     |
| 163099      | 29/Mar/2016                  | 2                    | 23.7                 | 413                 | 3.10            | F                | South West, Okinawa          | 0                               | 0           | 0       | 0     |
| 163100      | 11/Apr/2016                  | 3                    | 30.8                 | 1055                | 3.61            | F                | South West, Okinawa          | 0                               | 0           | 0       | 0     |
| 163101      | 11/Apr/2016                  | 4                    | 35.2                 | 1438                | 3.30            | F                | South West, Okinawa          | 0                               | 0           | 0       | 0     |
| 163102      | 15/Apr/2016                  | 8                    | 37.9                 | 1510                | 2.77            | F                | South West, Okinawa          | 0.003                           | 0.003       | 0.003   | 0.009 |
| 163103      | 18/Apr/2016                  | 7                    | 36.6                 | 1318                | 2.69            | F                | South West, Okinawa          | 0.003                           | 0.003       | 0.005   | 0.011 |
| 163104      | 18/Apr/2016                  | NO                   | 31.0                 | 1017                | 3.41            | F                | South West, Okinawa          | 0                               | 0           | 0       | 0     |
| 163105      | 18/Apr/2016                  | 4                    | 30.1                 | 830                 | 3.04            | NI               | South West, Okinawa          | 0.005                           | 0.005       | 0.003   | 0.012 |

<sup>1</sup> UK: unknown, <sup>2</sup> y: years old; NO: not observed, <sup>3</sup> SL: standard length, <sup>4</sup> BW: body weight, <sup>5</sup> CF: condition factor, CF = 100 × BW/SL<sup>2</sup>, <sup>6</sup> F: female; M: male; bi: bisexual; NI: not identified, <sup>7</sup> the locations of collection areas are shown in Figure 2, <sup>8</sup> 1B: CTX1B; epi-deoxy1B: 52-epi-54-deoxyCTX1B; deoxy1B: 54-deoxyCTX1B; 0: less than LOD; 0.003: detected but less than LOQ.

Table S1. Continued.

| Specimen ID | Collection date <sup>1</sup> | Age (y) <sup>2</sup> | SL <sup>3</sup> (cm) | BW <sup>4</sup> (g) | CF <sup>5</sup> | Sex <sup>6</sup> | Collection Area <sup>7</sup> | CTXs level (µg/kg) <sup>8</sup> |                     |         |       |
|-------------|------------------------------|----------------------|----------------------|---------------------|-----------------|------------------|------------------------------|---------------------------------|---------------------|---------|-------|
|             |                              |                      |                      |                     |                 |                  |                              | 1B                              | <i>epi</i> -deoxy1B | deoxy1B | Total |
| 163106      | 26/Apr/2016                  | 5                    | 33.9                 | 1185                | 3.04            | F                | unknown                      | 0                               | 0                   | 0       | 0     |
| 163107      | 06/May/2016                  | 5                    | 38.1                 | 1737                | 3.14            | F                | unknown                      | 0.009                           | 0.009               | 0.012   | 0.031 |
| 163108      | 06/May/2016                  | 6                    | 40.9                 | 2037                | 2.98            | F                | unknown                      | 0                               | 0                   | 0       | 0     |
| 163109      | 06/May/2016                  | 6                    | 39.7                 | 1928                | 3.08            | F                | unknown                      | 0.007                           | 0.005               | 0.010   | 0.022 |
| 163110      | 06/May/2016                  | 7                    | 40.0                 | 1997                | 3.12            | F                | unknown                      | 0.003                           | 0.003               | 0.003   | 0.009 |
| 163111      | 06/May/2016                  | 4                    | 24.4                 | 447                 | 3.08            | F                | unknown                      | 0                               | 0                   | 0       | 0     |
| 163112      | 06/May/2016                  | 18                   | 46.4                 | 2760                | 2.76            | M                | unknown                      | 0.003                           | 0.003               | 0.003   | 0.009 |
| 163113      | 06/Jun/2016                  | NO                   | 31.8                 | 871                 | 2.71            | F                | unknown                      | 0                               | 0                   | 0       | 0     |
| 163114      | 06/Jun/2016                  | 6                    | 34.8                 | 1280                | 3.04            | F                | unknown                      | 0.003                           | 0.003               | 0.003   | 0.009 |
| 163115      | 06/Jun/2016                  | 4                    | 34.1                 | 1153                | 2.91            | F                | unknown                      | 0.003                           | 0.003               | 0.003   | 0.009 |
| 163116      | 06/Jun/2016                  | 5                    | 31.2                 | 981                 | 3.23            | F                | unknown                      | 0                               | 0                   | 0       | 0     |
| 163117      | 04/Jul/2016                  | 4                    | 28.7                 | 756                 | 3.20            | F                | South West, Okinawa          | 0                               | 0                   | 0       | 0     |
| 163118      | 06/Jun/2016                  | 11                   | 47.0                 | 3300                | 3.18            | M                | unknown                      | 0.005                           | 0.003               | 0.005   | 0.013 |
| 163119      | 13/Jun/2016                  | 4                    | 36.8                 | 1735                | 3.48            | F                | unknown                      | 0.006                           | 0.006               | 0.010   | 0.023 |
| 163120      | 13/Jun/2016                  | NO                   | 35.0                 | 1413                | 3.30            | F                | unknown                      | 0                               | 0                   | 0       | 0     |
| 163121      | 22/Jun/2016                  | NO                   | 33.0                 | 1191                | 3.31            | F                | unknown                      | 0.003                           | 0.003               | 0.003   | 0.009 |
| 163122      | 13/Jun/2016                  | NO                   | 32.2                 | 1042                | 3.12            | F                | unknown                      | 0                               | 0                   | 0       | 0     |
| 163123      | 06/Aug/2016                  | 4                    | 29.2                 | 775                 | 3.11            | F                | unknown                      | 0.003                           | 0.003               | 0.003   | 0.009 |
| 163124      | 05/Sep/2016                  | 3                    | 16.3                 | 134                 | 3.09            | F                | Miyako                       | 0                               | 0                   | 0       | 0     |
| 163125      | 30/Sep/2016                  | 6                    | 37.9                 | 1533                | 2.82            | M                | Miyako                       | 0                               | 0                   | 0       | 0     |
| 163126      | 30/Sep/2016                  | 4                    | 31.7                 | 1032                | 3.24            | F                | Miyako                       | 0                               | 0                   | 0       | 0     |
| 163127      | 30/Sep/2016                  | 5                    | 34.5                 | 1317                | 3.21            | F                | Miyako                       | 0                               | 0                   | 0       | 0     |
| 163128      | 30/Sep/2016                  | 6                    | 36.4                 | 1295                | 2.69            | NI               | Miyako                       | 0.005                           | 0.003               | 0.006   | 0.014 |
| 163129      | 11/Oct/2016                  | NO                   | 42.0                 | 2441                | 3.29            | NI               | North West, Okinawa          | 0.010                           | 0.007               | 0.013   | 0.030 |
| 163130      | 11/Oct/2016                  | NO                   | 38.0                 | 1604                | 2.92            | NI               | North West, Okinawa          | 0.003                           | 0.003               | 0.003   | 0.009 |
| 163131      | 31/Oct/2016                  | NO                   | 20.3                 | 273                 | 3.26            | NI               | North West, Okinawa          | 0                               | 0                   | 0       | 0     |
| 163132      | 31/Oct/2016                  | NO                   | 21.2                 | 303                 | 3.18            | NI               | North West, Okinawa          | 0.003                           | 0.003               | 0.003   | 0.009 |
| 163155      | 31/Mar/2016                  | 3                    | 38.8                 | 1094                | 1.87            | F                | North West, Okinawa          | 0.003                           | 0.003               | 0.003   | 0.009 |
| Maximum     |                              | 18.0                 | 53.0                 | 4800                | 4.03            |                  | Maximum                      | 0.141                           | 0.174               | 0.157   | 0.376 |
| Minimum     |                              | 1.0                  | 13.5                 | 92                  | 1.87            |                  |                              |                                 |                     |         |       |
| Average     |                              | 4.8                  | 34.3                 | 1399                | 3.03            |                  |                              |                                 |                     |         |       |
| Median      |                              | 4.0                  | 34.0                 | 1209                | 3.04            |                  |                              |                                 |                     |         |       |
| SD          |                              | 3.0                  | 8.3                  | 907                 | 0.3             |                  |                              |                                 |                     |         |       |
| RSD         |                              | 61%                  | 24%                  | 65%                 | 12%             |                  |                              |                                 |                     |         |       |

<sup>1</sup> UK: unknown, <sup>2</sup> y: years; NO: not observed, <sup>3</sup> SL: standard length, <sup>4</sup> BW: body weight, <sup>5</sup> CF: condition factor, CF = 100 × BW/SL<sup>2</sup>, <sup>6</sup> F: female; M: male; bi: bisexual; NI: not identified, <sup>7</sup> the locations of collection areas are shown in Figure 2, <sup>8</sup> 1B: CTX1B; *epi*-deoxy1B: 52-*epi*-54-deoxyCTX1B; deoxy1B: 54-deoxyCTX1B; 0: less than LOD; 0.003: detected but less than LOQ.

**Table S2.** LC-MS/MS condition for CTX analysis**LC**

Equipment: Agilent 1290 Infinity (Agilent Technologies)  
 Column: Zorbax Eclipse Plus C18  
 (1.8  $\mu$ m, 2.1 x 50 mm, Agilent Technologies)  
 Column Temp.: 40 °C  
 Injection volume: 5  $\mu$ L  
 Eluent A: 5 mM ammonium formate in 0.1% formic acid  
 Eluent B: methanol  
 Flow rate: 0.4 mL/min  
 Gradient condition: 0 min (60%B)–0.25 min (60%B)–0.5 min (75%B)–  
 12 min (90%B)–14 min (90%B)–14.1 min (100%B)

**MS**

Equipment: 6460 Triple Quad LC/MS (Agilent Technologies)  
 Ionization: ESI with Agilent Jet Stream  
 Nebulizer gas: N<sub>2</sub>, 50 psi  
 Sheath gas: N<sub>2</sub>, 380 °C, 11 L/min  
 Dry gas: 300 °C, 10 L/min  
 Capillary voltage: 5000 V  
 Fragmentor voltage: 300 V  
 Collision energy: 40 eV  
 Monitor ions: [M+Na]<sup>+</sup> > [M+Na]<sup>+</sup>  
*m/z* 1045.6: CTX3C and 49-*epi*CTX3C  
*m/z* 1061.6: 2-hydroxyCTX3C and 51-hydroxyCTX3C  
*m/z* 1079.6: 2,3-dihydroxyCTX3C  
*m/z* 1083.6: CTX4A and CTX4B  
*m/z* 1095.6: 2,3,51-trihydroxyCTX3C  
*m/z* 1117.6: 52-*epi*-54-deoxyCTX1B and 54-deoxyCTX1B  
*m/z* 1133.5: CTX1B

**Table S3.** The CTXs levels in the flesh of *V. louti* by age collected from the Ryukyu Islands, Japan.

| Age (years old) | Total CTXs levels (µg/kg) |                           |     |                          |      |                         |
|-----------------|---------------------------|---------------------------|-----|--------------------------|------|-------------------------|
|                 | Total                     | <0.003 (LOD) <sup>1</sup> |     | 0.003-0.010 <sup>2</sup> |      | 0.011-0.17 <sup>3</sup> |
| 1               | 2                         |                           |     | 2                        | 100% |                         |
| 2               | 21                        | 12                        | 57% | 7                        | 33%  | 2 10%                   |
| 3               | 20                        | 9                         | 45% | 5                        | 25%  | 6 30%                   |
| 4               | 29                        | 8                         | 28% | 10                       | 34%  | 11 38%                  |
| 5               | 20                        | 8                         | 40% | 2                        | 10%  | 10 50%                  |
| 6               | 9                         | 4                         | 44% | 1                        | 11%  | 4 44%                   |
| 7               | 7                         |                           |     | 1                        | 14%  | 6 86%                   |
| 8               | 2                         |                           |     | 1                        | 50%  | 1 50%                   |
| 9               | 2                         | 1                         | 50% |                          |      | 1 50%                   |
| 10              | 3                         |                           |     |                          |      | 3 100%                  |
| 11              | 1                         |                           |     |                          |      | 1 100%                  |
| 12              | 3                         |                           |     |                          |      | 2 67%                   |
| 13              | 1                         |                           |     |                          |      | 1 100%                  |
| 14              | 2                         |                           |     |                          |      | 2 100%                  |
| 15              |                           |                           |     |                          |      |                         |
| 16              |                           |                           |     |                          |      |                         |
| 17              |                           |                           |     |                          |      |                         |
| 18              | 1                         |                           |     | 1                        | 100% |                         |
| Total           | 123                       | 42                        | 34% | 30                       | 24%  | 49 40%                  |

<sup>1</sup> All CTX analogues were less than LOD (0.003 µg/kg).

<sup>2</sup> CTXs were detected but the levels were below FDA guidance (0.01 µg/kg) [64] [61].

<sup>3</sup> The levels were above the FDA guidance but less than the minimum levels that caused CFP as described below.

<sup>4</sup> The CTXs levels may cause CFP by the consumption of the 400 g or less amount of the flesh. The level was estimated based on the minimum amount of CTX1B cause CFP (70 ng CTX1B/person, 70 ng CTX1B/400 g flesh = 0.18 µg/kg) [10].

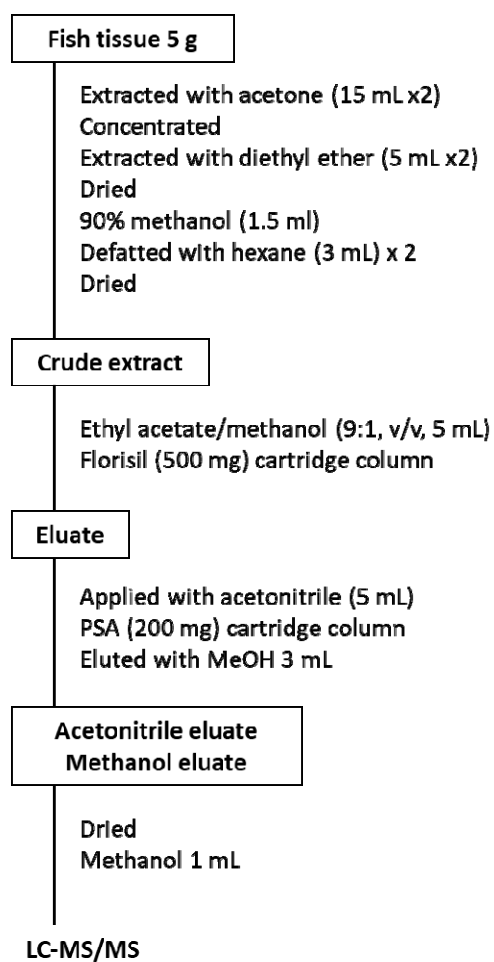

**Figure S1.** Sample preparation from flesh for LC-MS/MS.



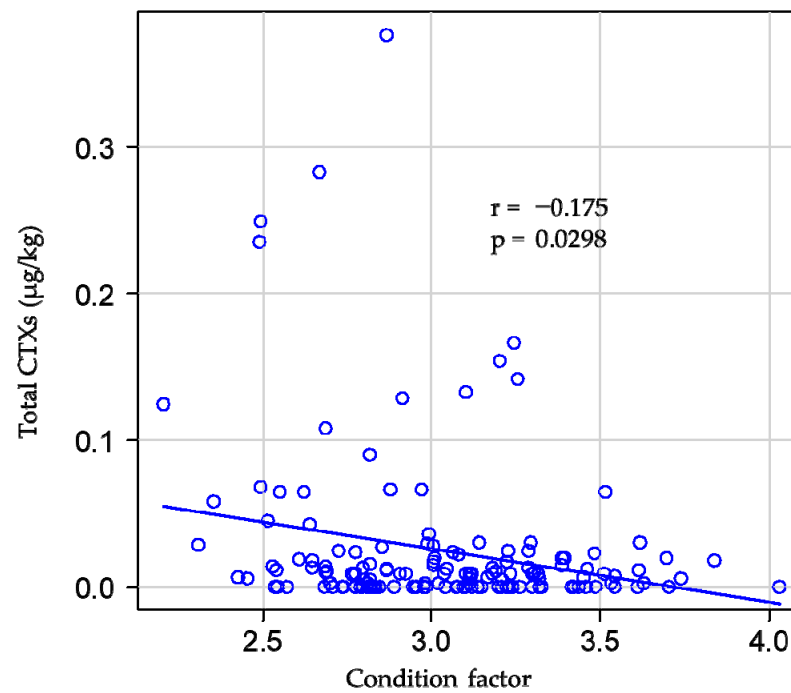

**Figure S2.** The relationship between the condition factors and the total CTX levels in the flesh of *V. louti* specimens collected from the Ryukyu Island, Japan.

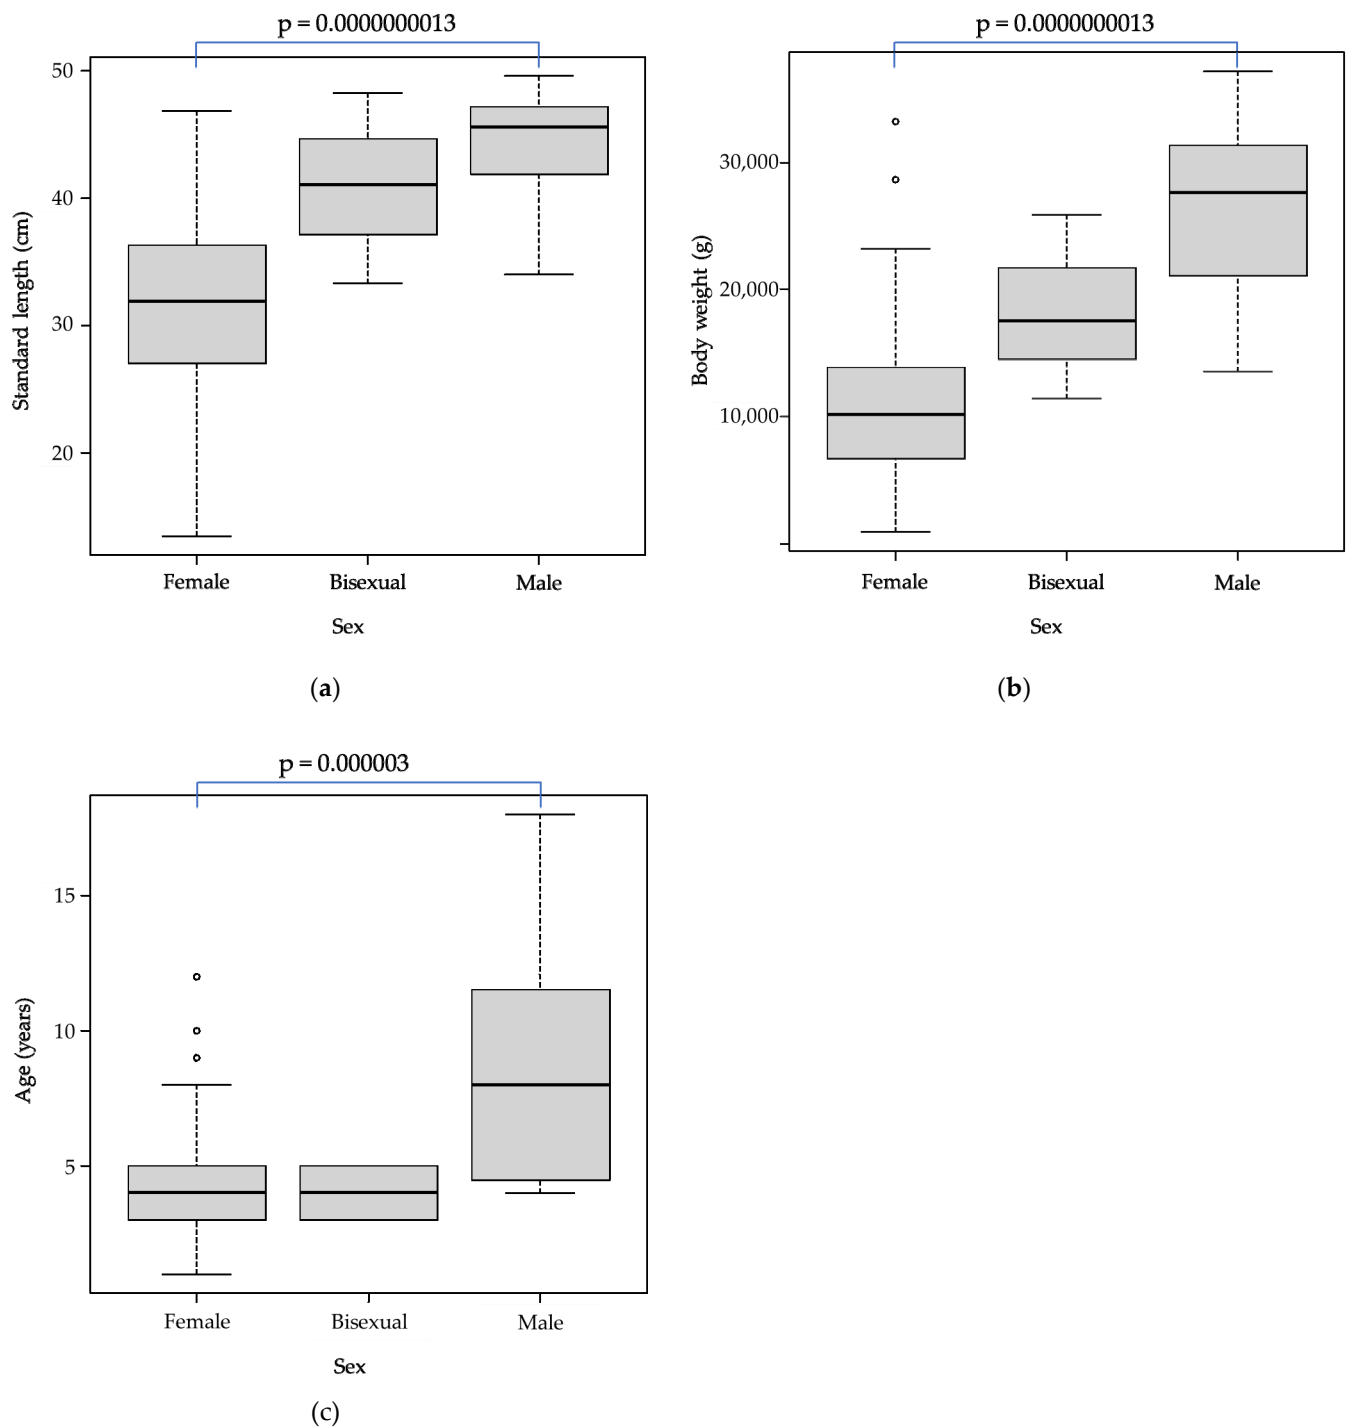

**Figure S3.** Relationship between the genders and other biological data (a: total length, b: body weight, and c: age) of *V. louti* specimens collected from the Ryukyu Islands, Japan.

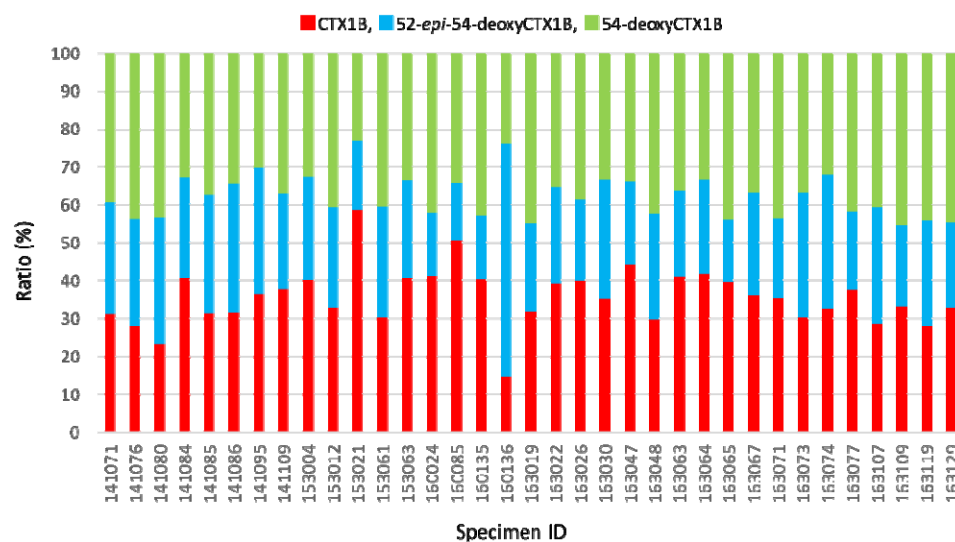

**Figure S4.** CTXs profiles of *V. louti* specimens collected from Ryukyu Island, Japan, from which quantifiable levels of CTXS were detected (n = 36).
